# Supplementary material
Source: MDPI journal article supplement (https://www.mdpi.com/2072-4292/16/1/124)
Supplement: s1 [file s1]

# Supplementary Materials: Using Atmospheric Inverse Modelling of Methane Budgets With Copernicus Land Water and Wetness Data to Detect Land Use Related Emissions

Maria K. Tenkanen <sup>1,\*</sup>, Aki Tsuruta <sup>1</sup>, Vilna Tyystjärvi <sup>1</sup>, Markus Törmä <sup>2</sup>, Iida Autio <sup>2</sup>, Markus Haakana <sup>3</sup>, Tarja Tuomainen <sup>3</sup>, Antti Leppänen <sup>4</sup>, Tiina Markkanen <sup>1</sup>, Maarit Raivonen <sup>4</sup>, Sini Niinistö <sup>5</sup>, Ali Nadir Arslan <sup>6</sup> and Tuula Aalto <sup>1</sup>

## 1. Decomposition of Optimized Methane Emissions to Different Land Cover Classes Using Proportional Corine Land Cover Classes

The CH<sub>4</sub> emission estimates were first assigned to different land cover classes based on the proportional coverage given by the CLC data aggregated to 1° × 1° resolution and keeping the original resolution of CTE-CH<sub>4</sub>. When calculating the average CH<sub>4</sub> emission of a land cover class, the CH<sub>4</sub> emissions ([g]) in a single grid cell were first multiplied by the fraction of the land cover class ([%]) in that grid cell, i.e. it was assumed that each land cover class had the same flux per area in a single grid cell and only the proportional fraction differed. These proportional emissions were then summed over the whole of Finland and the sum was divided by the total area of the land cover class ([m<sup>2</sup>]) which gave the average annual CH<sub>4</sub> emissions per land cover class area ([g/m<sup>2</sup>]).

Confidence intervals for the average CH<sub>4</sub> emissions per land cover class were defined as follows: the CH<sub>4</sub> emissions and the land cover class area per pixel were paired and the pairs were sorted by the magnitude of the CH<sub>4</sub> emissions from lowest to highest. The land cover class area was then calculated as a cumulative sum and normalised from zero to one. From the normalised cumulative sum, the values 0.25 and 0.75 were selected and the methane emissions associated with these values were taken as the 25% and 75% confidence intervals. This method selected confidence intervals with the same methane emissions for each land cover class, but weighted them by the area of the land cover class, giving more weight to methane emissions where the land cover class had a larger area.

The process was repeated separately for average annual natural, anthropogenic and total CH<sub>4</sub> emissions to evaluate whether different land cover classes stood out of the rest depending on the CH<sub>4</sub> source as we would expect. From the analysis, we excluded land cover classes that cover less than 0.2% (755 km<sup>2</sup>) of the total area of Finland. These classes were 'Forest land, afforested peat', 'Transitional woodland, deforested', 'Transitional woodland, peat, deforested', and 'Wetlands, Marsh'. The exclusion was done to streamline the analysis since it was unexpected that the listed classes would have resulted in reliable results in the machine learning approach given the large difference between the resolution of the inversions and the land cover map.

The range of estimated annual CH<sub>4</sub> fluxes decomposed for selected land cover classes is shown for natural emissions in Figure S5, anthropogenic emissions in Figure S6 and total emissions in Figure S7. The two inversions Inv<sub>LPX</sub> and Inv<sub>JSBACH</sub> agreed well with each other, although Inv<sub>LPX</sub> showed lower natural and consequently lower total CH<sub>4</sub> emissions. The results were similar to those obtained using XGBoost, but there were some notable differences. The main difference is that the magnitude of emissions from different land cover classes was smaller, especially for anthropogenic and total emissions. This is expected as the resolution of 1° × 1° was coarse compared to the resolution and heterogeneity of Corine land cover classes. As can be seen from Figure S8, most land cover classes were correlated with other land cover classes, meaning that there was approximately the same amount of land cover classes in several grid cells. Thus, it was difficult to separate the different categories and the estimated emissions were similar across the land cover classes. However, as was the case with the XGBoost method, the classes "Wetlands, Open bog" and "Transitional woodland, peat" showed elevated CH<sub>4</sub> emissions compared to the other categories.

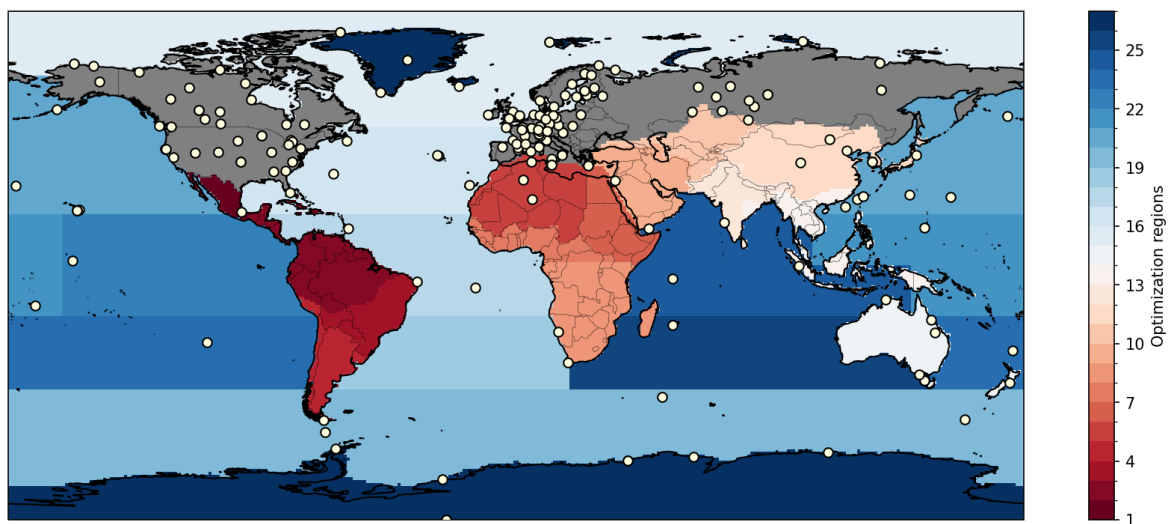

**Figure S1.** Optimisation regions. The grey region was optimised at  $1^\circ$  latitude  $\times$   $1^\circ$  longitude resolution. Circles show the locations of the in situ observation sites from which the concentration observations were used in this study.

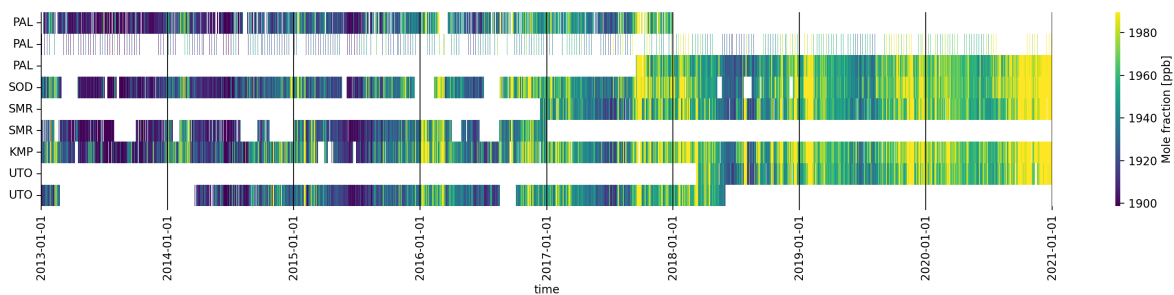

**Figure S2.** Daily averaged  $\text{CH}_4$  mole fraction observations [ppb] in Finnish measurement stations in 2013–2020. The duplicate sites mark the data set before and after the site was included in ICOS. In Pallas, there were also taken flask samples which are shown with discontinuous colour lines.

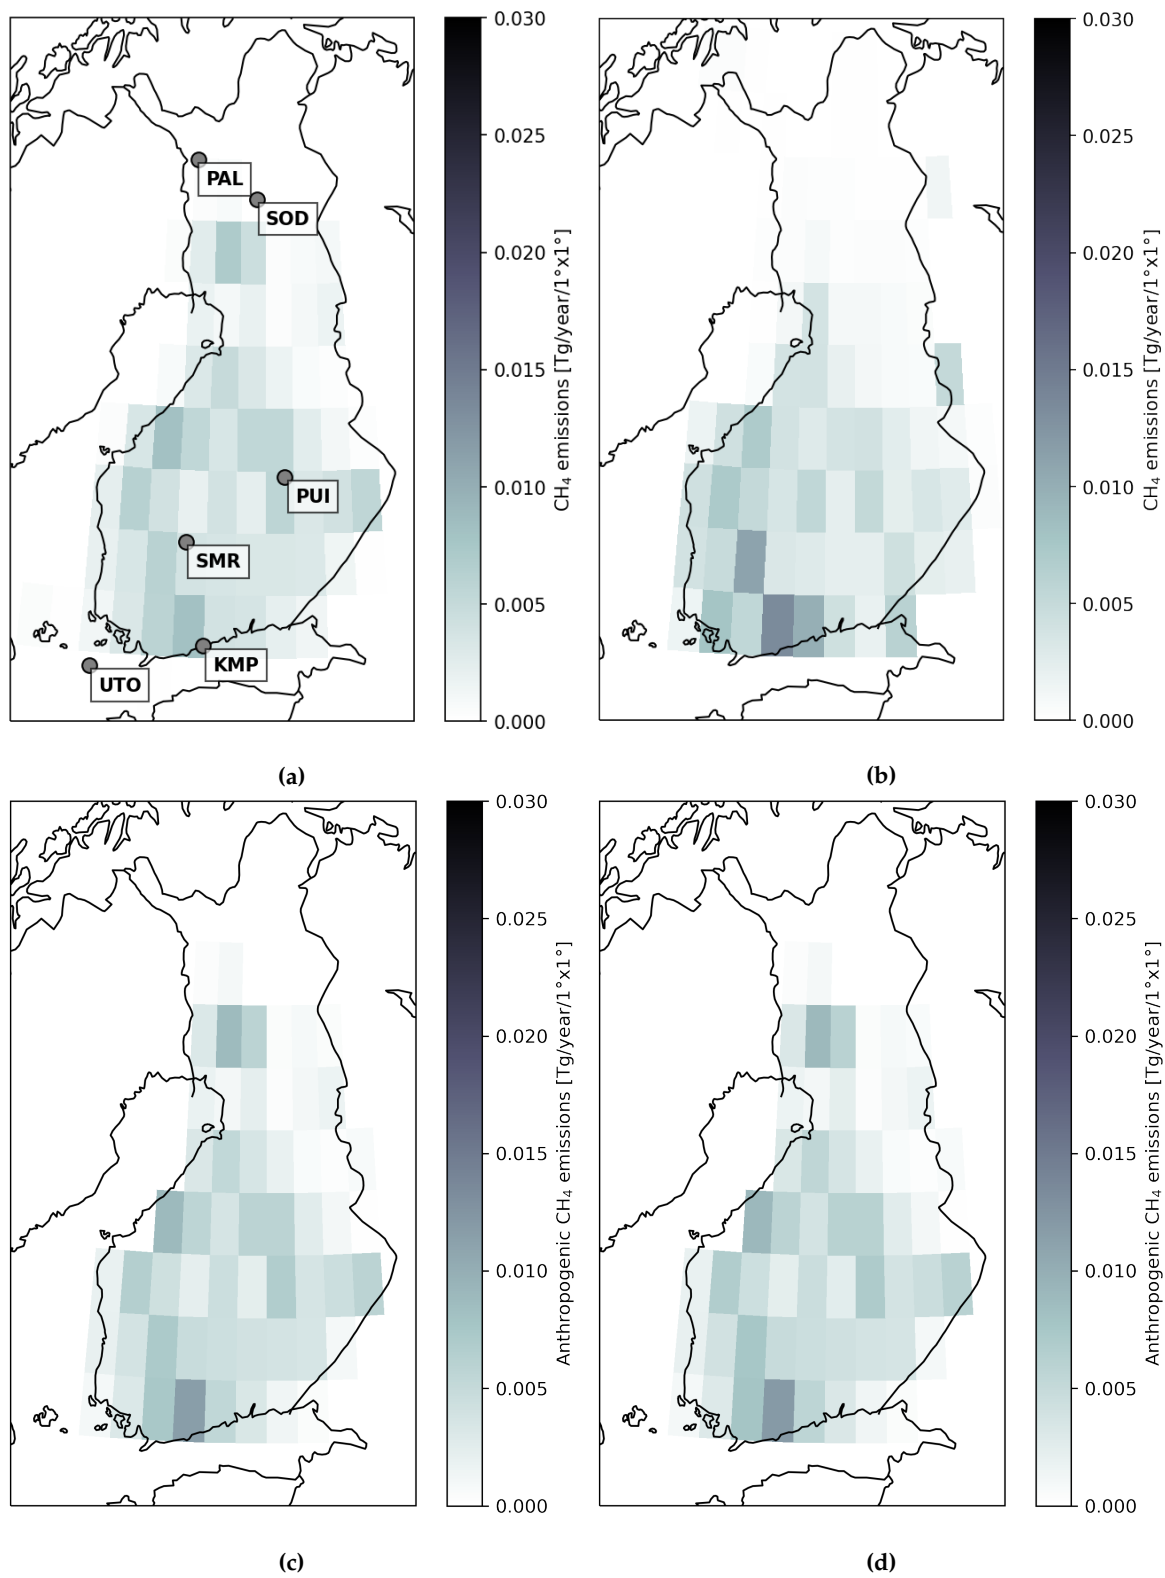

**Figure S3.** Annual average from 2013–2020 of a) the redistributed CAMS-REG  $\text{CH}_4$  emissions, b) the original CAMS-REG, c) the optimised anthropogenic  $\text{CH}_4$  emissions from  $\text{Inv}_{\text{SBACH}}$  and d) the optimised anthropogenic  $\text{CH}_4$  emissions from  $\text{Inv}_{\text{LPX}}$ .

**Table S1.** List of the Finnish surface observation sites used in inversions. Observation Uncertainty (Obs. Unc.) is used to define diagonal values in the observation covariance matrix. The data type is categorized into two measurements (discrete (D) and continuous (C)).

| Sitecode | Site Name                         | Country | Contributor     | Longitude<br>[°E] | Latitude<br>[°N] | Height*<br>[m a.s.l.] | Obs. Unc.<br>[ppb] | Data type<br>D/C | Date min.**<br>[year/month] | Date max.<br>[year/month] |
|----------|-----------------------------------|---------|-----------------|-------------------|------------------|-----------------------|--------------------|------------------|-----------------------------|---------------------------|
| KMP      | Kumpula                           | Finland | FMI             | 24.96             | 60.20            | 53.00                 | 30.0               | C                | 2010/01                     | 2019/12                   |
| PAL      | Pallas-Sammaltunturi, GAW Station | Finland | NOAA            | 24.12             | 67.97            | 570.00                | 15.0               | D                | 2001/12                     | 2021/03                   |
| PAL      | Pallas-Sammaltunturi, GAW Station | Finland | FMI             | 24.12             | 67.97            | 570.00                | 15.0               | C                | 2004/02                     | 2017/12                   |
| PAL      | Pallas-Sammaltunturi, GAW Station | Finland | ICOS-ATC, FMI   | 24.12             | 67.97            | 577.00                | 15.0               | C                | 2017/09                     | 2021/04                   |
| PUI      | Puijo                             | Finland | FMI             | 27.66             | 62.91            | 84.00                 | 30.0               | C                | 2011/11                     | 2019/12                   |
| SMR      | Hyttälä                           | Finland | ICOS-ATC, UHELS | 24.29             | 61.85            | 306.00                | 25.0               | C                | 2016/12                     | 2021/04                   |
| SOD      | Sodankylä                         | Finland | FMI             | 26.64             | 67.36            | 227.00                | 25.0               | C                | 2012/01                     | 2019/12                   |
| UTO      | Uto                               | Finland | FMI             | 21.37             | 59.78            | 65.00                 | 25.0               | C                | 2012/03                     | 2018/03                   |
| UTO      | Uto                               | Finland | ICOS-ATC, FMI   | 21.37             | 59.78            | 65.00                 | 25.0               | C                | 2018/03                     | 2021/04                   |

\*Sampling heights from which atmospheric CH<sub>4</sub> is sampled in TM5. \*\*Observations used in this study between 2010 and 2018.

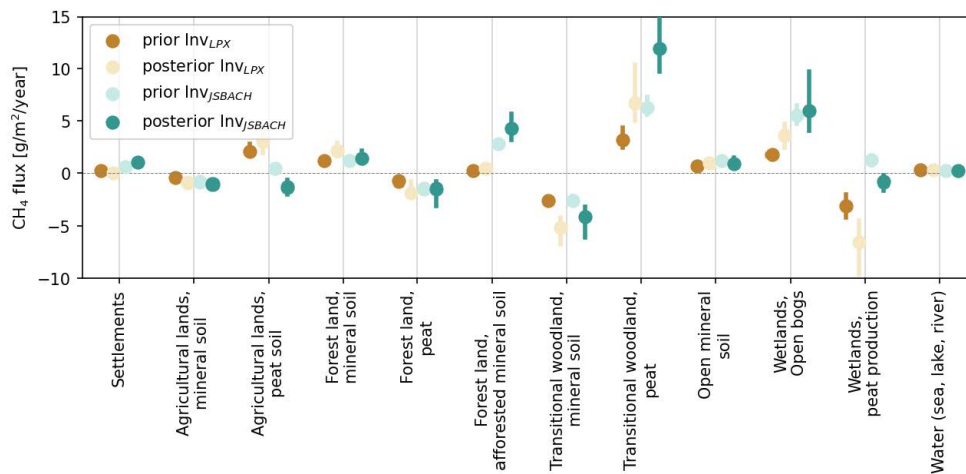

**Figure S4.** The range of the annual natural CH<sub>4</sub> fluxes (2013–2020) for selected land cover classes estimated with linear regression using prior and optimised natural CH<sub>4</sub> emissions from InvLPX and InvJSBACH.

**Table S2.** List of surface observation sites used in inversions. Observation Uncertainty (Obs. Unc.) is used to define diagonal values in the observation covariance matrix. The data type is categorized into two measurements (discrete (D) and continuous (C)).

| Sitecode | Site Name                                         | Country              | Contributor       | Longitude<br>[°E] | Latitude<br>[°N] | Height*<br>[m a.s.l.] | Obs. Unc.<br>[ppb] | Data type<br>D/C | Date min.**<br>[year/month] | Date max.<br>[year/month] |
|----------|---------------------------------------------------|----------------------|-------------------|-------------------|------------------|-----------------------|--------------------|------------------|-----------------------------|---------------------------|
| ABP      | Arembepe, Bahia                                   | Brazil               | NOAA              | -38.17            | -12.76           | 6.00                  | 4.5                | D                | 2006/10                     | 2010/01                   |
| ABT      | Abbotsford, British Columbia                      | Canada               | EC                | -122.34           | 49.01            | 93.00                 | 30.0               | C                | 2014/03                     | 2019/06                   |
| ALT      | Alert, Nunavut                                    | Canada               | NOAA              | -62.51            | 82.45            | 190.00                | 15.0               | D                | 1999/01                     | 2021/02                   |
| ALT      | Alert, Nunavut                                    | Canada               | EC                | -62.51            | 82.45            | 195.00                | 15.0               | C                | 1999/01                     | 2019/07                   |
| AMT      | Argyle, Maine                                     | United States        | NOAA              | -68.66            | 45.01            | 157.00                | 30.0               | D                | 2003/09                     | 2006/11                   |
| AMY      | Anmyeon-do                                        | Republic of Korea    | NOAA              | 126.33            | 36.54            | 87.00                 | 30.0               | D                | 2013/12                     | 2021/03                   |
| ARA      | Arcturus                                          | Australia            | CSIRO             | 148.47            | -23.86           | 185.00                | 15.0               | D                | 2010/05                     | 2013/10                   |
| ASC      | Ascension Island                                  | United Kingdom       | NOAA              | -14.40            | -7.97            | 90.00                 | 15.0               | D                | 1999/01                     | 2021/02                   |
| ASK      | Assekrem                                          | Algeria              | NOAA              | 5.63              | 23.26            | 2715.00               | 25.0               | D                | 1999/01                     | 2019/11                   |
| AZR      | Terceira Island, Azores                           | Portugal             | NOAA              | -27.36            | 38.76            | 24.00                 | 15.0               | D                | 1999/01                     | 2021/02                   |
| AZV      | Azovo                                             | Russian Federation   | NIES              | 73.03             | 54.71            | 190.00                | 30.0               | C                | 2009/10                     | 2018/12                   |
| BAL      | Baltic Sea                                        | Poland               | NOAA              | 16.67             | 55.35            | 28.00                 | 75.0               | D                | 1999/01                     | 2011/06                   |
| BAR      | Baranova                                          | Russian Federation   | FMI               | 101.62            | 79.28            | 30                    | 4.5                | C                | 2015/11                     | 2020/12                   |
| BCK      | Behchoko, Northwest Territories                   | Canada               | EC                | -115.92           | 62.80            | 220.00                | 15.0               | C                | 2010/10                     | 2019/06                   |
| BHD      | Baring Head Station                               | New Zealand          | NOAA              | 174.87            | -41.41           | 90.00                 | 4.5                | D                | 2002/03                     | 2020/08                   |
| BIK      | Bialystok                                         | Poland               | MPiBGC            | 23.01             | 53.23            | 483.00                | 25.0               | C                | 2005/07                     | 2014/06                   |
| BIR      | Birkenes                                          | Norway               | NILU              | 8.25              | 58.39            | 219                   | 25.0               | C                | 2009/05                     | 2018/12                   |
| BKT      | Bukit Kototabang                                  | Indonesia            | NOAA              | 100.31            | -0.20            | 875.00                | 75.0               | D                | 2004/01                     | 2021/03                   |
| BLK      | Baker Lake, Nunavut                               | Canada               | EC                | -96.01            | 64.33            | 61.00                 | 15.0               | C                | 2017/07                     | 2019/07                   |
| BME      | St. Davids Head, Bermuda                          | United Kingdom       | NOAA              | -64.65            | 32.37            | 17.00                 | 15.0               | D                | 1999/01                     | 2010/01                   |
| BMW      | Tudor Hill, Bermuda                               | United Kingdom       | NOAA              | -64.88            | 32.26            | 33.00                 | 15.0               | D                | 1999/01                     | 2021/03                   |
| BRA      | Bratt's Lake Saskatchewan                         | Canada               | EC                | -104.71           | 50.20            | 630.00                | 75.0               | C                | 2009/10                     | 2019/07                   |
| BRW      | Barrow Atmospheric Baseline Observatory           | United States        | NOAA              | -156.61           | 71.32            | 27.46                 | 15.0               | C                | 1999/01                     | 2021/04                   |
| BRW      | Barrow Atmospheric Baseline Observatory           | United States        | NOAA              | -156.58           | 71.32            | 16.00                 | 15.0               | D                | 1999/01                     | 2021/03                   |
| BRZ      | Berezorechka                                      | Russian Federation   | NIES              | 84.33             | 56.15            | 248.00                | 75.0               | C                | 2008/05                     | 2018/12                   |
| BSC      | Black Sea, Constanta                              | Romania              | NOAA              | 28.66             | 44.18            | 5.00                  | 75.0               | D                | 1999/01                     | 2011/12                   |
| BSD      | Bilsdale                                          | United Kingdom       | UNIVBRIS          | -1.15             | 54.36            | 628.00                | 30.0               | C                | 2014/01                     | 2019/12                   |
| CBA      | Cold Bay, Alaska                                  | United States        | NOAA              | -162.71           | 55.21            | 25.00                 | 15.0               | D                | 1999/01                     | 2021/04                   |
| CBY      | Cambridge Bay, Nunavut Territory                  | Canada               | EC                | -105.06           | 69.13            | 47.00                 | 15.0               | C                | 2012/12                     | 2019/07                   |
| CDL      | Candle Lake, Saskatchewan                         | Canada               | EC                | -105.12           | 53.99            | 630.00                | 30.0               | C                | 2002/06                     | 2008/01                   |
| CFA      | Cape Ferguson                                     | Australia            | CSIRO             | 147.06            | -19.28           | 5.00                  | 25.0               | D                | 1991/06                     | 2021/04                   |
| CCO      | Cape Grim, Tasmania                               | Australia            | NOAA              | 144.68            | -40.68           | 164.00                | 4.5                | D                | 1999/01                     | 2021/02                   |
| CCO      | Cape Grim                                         | Australia            | CSIRO             | 144.68            | -40.68           | 94.00                 | 15.0               | C                | 2012/07                     | 2021/07                   |
| CGR      | Charles Point, Darwin                             | Australia            | CSIRO             | 12.65             | 37.67            | 9.00                  | 25.0               | C                | 2015/04                     | 2018/12                   |
| CHL      | Churchill, Manitoba                               | Canada               | EC                | -93.82            | 58.74            | 89.00                 | 15.0               | C                | 2011/10                     | 2019/07                   |
| CHM      | Chibougamau, Quebec                               | Canada               | EC                | -74.34            | 49.69            | 423.00                | 30.0               | C                | 2007/08                     | 2011/04                   |
| CHR      | Christmas Island                                  | Republic of Kiribati | NOAA              | -157.15           | 1.70             | 5.00                  | 15.0               | D                | 1999/01                     | 2020/01                   |
| CIB      | Centro de Investigacion de la Baja Atmosfera      | Spain                | NOAA              | -4.93             | 41.81            | 850.00                | 25.0               | D                | 2009/05                     | 2021/03                   |
| CMN      | Mt. Cimone Station                                | Italy                | UNIURB            | 10.68             | 44.17            | 2172.00               | 15.0               | C                | 2008/07                     | 2017/12                   |
| CMN      | Mt. Cimone Station                                | Italy                | ICOS-ATC,CNR-ISAC | 10.70             | 44.19            | 2173.00               | 15.0               | C                | 2018/05                     | 2021/05                   |
| CPS      | Chapais,Quebec                                    | Canada               | EC                | -74.98            | 49.82            | 431.00                | 15.0               | C                | 2011/12                     | 2019/07                   |
| CPT      | Cape Point                                        | South Africa         | NOAA              | 18.49             | -34.35           | 260.00                | 25.0               | D                | 2010/02                     | 2021/03                   |
| CRI      | Cape Rama                                         | India                | CSIRO             | 73.83             | 15.08            | 66.00                 | 75.0               | D                | 1993/02                     | 2013/01                   |
| CRV      | Carbon in Arctic Reservoirs Vulnerability Expe... | United States        | NOAA              | -147.60           | 64.99            | 643.13                | 15.0               | C                | 2011/10                     | 2021/05                   |
| CRZ      | Crozet Island                                     | France               | NOAA              | 51.85             | -46.43           | 202.00                | 4.5                | D                | 1999/01                     | 2020/11                   |
| CUR      | Monte Curcio                                      | Italy                | IIA               | 16.42             | 39.32            | 1801.00               | 15.0               | C                | 2014/12                     | 2017/12                   |
| CYA      | Casey Station, Antarctica                         | Australia            | CSIRO             | 110.52            | -66.28           | 55.00                 | 4.5                | D                | 1997/06                     | 2021/01                   |
| DEM      | Demyanskoe                                        | Russian Federation   | NIES              | 70.87             | 59.79            | 155.00                | 30.0               | C                | 2005/09                     | 2018/12                   |
| DRP      | Drake Passage                                     | Drake Passage        | NOAA              | -61.68            | -59.07           | 10.00                 | 4.5                | D                | 2006/03                     | 2020/12                   |
| DSI      | Dongsha Island                                    | Taiwan               | NOAA              | 116.73            | 20.70            | 8.00                  | 15.0               | D                | 2010/03                     | 2021/03                   |
| DVV      | Danville, Virginia                                | United States        | PSU               | -79.44            | 36.71            | 492.00                | 15.0               | C                | 2016/07                     | 2017/12                   |
| EGB      | Egbert, Ontario                                   | Canada               | EC                | -79.78            | 44.23            | 276.00                | 25.0               | C                | 2005/03                     | 2019/06                   |
| EIC      | Easter Island                                     | Chile                | NOAA              | -109.45           | -27.13           | 72.00                 | 4.5                | D                | 1999/01                     | 2019/11                   |
| ENA      | Eastern North Atlantic, Graciosa, Azores          | Portugal             | LBNL-ARM          | -28.03            | 39.09            | 40.48                 | 25.0               | C                | 2015/07                     | 2019/12                   |
| ESP      | Estevan Point, British Columbia                   | Canada               | EC                | -126.54           | 49.38            | 47.00                 | 25.0               | C                | 2009/03                     | 2019/07                   |
| EST      | Esther, Alberta                                   | Canada               | EC                | -110.21           | 51.67            | 757.00                | 30.0               | C                | 2010/01                     | 2019/07                   |
| ETL      | East Trout Lake, Saskatchewan                     | Canada               | EC                | -104.99           | 54.35            | 598.00                | 30.0               | C                | 2005/08                     | 2019/07                   |
| FNE      | Fort Nelson, British Columbia                     | Canada               | EC                | -122.57           | 58.84            | 376.00                | 30.0               | C                | 2014/07                     | 2019/07                   |
| FSD      | Fraserdale                                        | Canada               | EC                | -81.57            | 49.88            | 250.00                | 30.0               | C                | 1999/01                     | 2019/07                   |
| GAT      | Gartow                                            | Germany              | ICOS-ATC,HPB      | 11.44             | 53.07            | 411.00                | 25.0               | C                | 2016/05                     | 2021/05                   |
| GCI      | Millerville, AL                                   | United States        | PSU               | -85.89            | 33.18            | 428.00                | 25.0               | C                | 2017/10                     | 2018/05                   |
| GMI      | Mariana Islands                                   | Guam                 | NOAA              | 144.66            | 13.39            | 8.00                  | 15.0               | D                | 1999/01                     | 2021/03                   |
| GPA      | Gunn Point                                        | Australia            | CSIRO             | 131.04            | -12.25           | 37.00                 | 75.0               | D                | 2010/08                     | 2021/02                   |
| HBA      | Halley Station, Antarctica                        | United Kingdom       | NOAA              | -26.21            | -75.61           | 35.00                 | 4.5                | D                | 1999/01                     | 2020/02                   |
| HEI      | Heidelberg                                        | Germany              | IUP               | 8.68              | 49.42            | 143.00                | 30.0               | C                | 2005/01                     | 2014/09                   |
| HNP      | Hanlan's Point, Ontario                           | Canada               | EC                | -79.39            | 43.61            | 97.00                 | 25.0               | C                | 2014/06                     | 2019/04                   |
| HPB      | Hohenpeissenberg                                  | Germany              | NOAA              | 11.02             | 47.80            | 941.00                | 25.0               | D                | 2006/04                     | 2021/03                   |
| HPB      | Hohenpeissenberg                                  | Germany              | ICOS-ATC,HPB      | 11.02             | 47.80            | 1065.00               | 25.0               | C                | 2015/09                     | 2021/05                   |
| HSU      | Humboldt State University                         | United States        | NOAA              | -124.44           | 41.57            | 7.60                  | 30.0               | D                | 2008/05                     | 2017/05                   |
| HTM      | Hyltemossa                                        | Sweden               | ICOS-ATC,LUND-CEC | 13.42             | 56.10            | 265.00                | 25.0               | C                | 2017/04                     | 2021/04                   |
| HUN      | Hegyatsal                                         | Hungary              | NOAA              | 16.65             | 46.95            | 344.00                | 25.0               | D                | 1999/01                     | 2021/01                   |
| HUN      | Hegyatsal                                         | Hungary              | HMS               | 16.65             | 46.95            | 344.00                | 75.0               | C                | 2006/03                     | 2014/10                   |
| ICE      | Storhofdi, Vestmannaeyjar                         | Iceland              | NOAA              | -20.29            | 63.40            | 121.70                | 15.0               | D                | 1999/01                     | 2021/02                   |
| IGR      | Grim                                              | Russian Federation   | NIES              | 64.41             | 63.19            | 89.00                 | 30.0               | C                | 2005/04                     | 2013/07                   |
| INU      | Inuvik,Northwest Territories                      | Canada               | EC                | -133.53           | 68.32            | 123.00                | 15.0               | C                | 2012/02                     | 2019/07                   |
| IPR      | Ispra                                             | Italy                | ICOS-ATC,JRC      | 8.64              | 45.81            | 310.00                | 30.0               | C                | 2017/12                     | 2021/04                   |
| IZO      | Izana, Tenerife, Canary Islands                   | Spain                | NOAA              | -16.48            | 28.30            | 2377.90               | 25.0               | D                | 1999/01                     | 2021/02                   |
| JFJ      | Jungfraujoch                                      | Switzerland          | EMPA              | 7.99              | 46.55            | 3580.00               | 15.0               | C                | 2014/01                     | 2017/12                   |
| JFJ      | Jungfraujoch                                      | Switzerland          | ICOS-ATC,HFSJG    | 7.99              | 46.55            | 3585.00               | 15.0               | C                | 2016/12                     | 2021/04                   |
| KEY      | Key Biscayne, Florida                             | United States        | NOAA              | -80.20            | 25.67            | 6.00                  | 25.0               | D                | 1999/01                     | 2021/02                   |

\*Sampling heights from which atmospheric CH<sub>4</sub> is sampled in TM5. \*\*Observations used in this study between 2010 and 2018.

Table S2. Continuation to the table S2.

| Sitecode | Site Name                                         | Country                   | Contributor       | Longitude<br>[°E] | Latitude<br>[°N] | Height*<br>[m a.s.l.] | Obs. Unc.<br>[ppb] | Data type<br>D/C | Date min.**<br>[year/month] | Date max.<br>[year/month] |
|----------|---------------------------------------------------|---------------------------|-------------------|-------------------|------------------|-----------------------|--------------------|------------------|-----------------------------|---------------------------|
| KIT      | Karlsruhe                                         | Germany                   | ICOS-ATC,HPB      | 8.42              | 49.09            | 310.00                | 30.0               | C                | 2016/12                     | 2021/04                   |
| KJN      | Kjolnes                                           | Norway                    | Univ. Exeter      | 29.23             | 70.85            | 20                    | 15.0               | C                | 2013/10                     | 2018/08                   |
| KRE      | Kresin u Pacova                                   | Czech Republic            | ICOS              | 15.08             | 49.57            | 784.00                | 25.0               | C                | 2017/04                     | 2021/04                   |
| KRS      | Karasevce                                         | Russian Federation        | NIES              | 82.42             | 58.25            | 156.00                | 30.0               | C                | 2004/09                     | 2018/12                   |
| KUM      | Cape Kumukahi, Hawaii                             | United States             | NOAA              | -155.01           | 19.51            | 3.00                  | 15.0               | D                | 1999/01                     | 2021/04                   |
| KZD      | Sary Taunkum                                      | Kazakhstan                | NOAA              | 75.57             | 44.45            | 600.00                | 75.0               | D                | 1999/01                     | 2009/08                   |
| KZM      | Plateau Assy                                      | Kazakhstan                | NOAA              | 77.87             | 43.25            | 2524.00               | 25.0               | D                | 1999/01                     | 2009/08                   |
| LEF      | Park Falls, Wisconsin                             | United States             | NOAA              | -90.27            | 45.95            | 868.00                | 30.0               | C                | 2010/09                     | 2021/05                   |
| LEF      | Park Falls, Wisconsin                             | United States             | NOAA              | -90.26            | 45.95            | 868.00                | 30.0               | D                | 1999/01                     | 2021/04                   |
| LIN      | Lindenberg                                        | Germany                   | ICOS-ATC,HPB      | 14.12             | 52.17            | 171.00                | 30.0               | C                | 2015/10                     | 2021/05                   |
| LLB      | Lac La Biche, Alberta                             | Canada                    | NOAA              | -112.45           | 54.95            | 546.10                | 30.0               | D                | 2008/01                     | 2013/02                   |
| LLB      | Lac La Biche, Alberta                             | Canada                    | EC                | -112.47           | 54.95            | 590.00                | 30.0               | C                | 2007/04                     | 2019/07                   |
| LLN      | Lulin                                             | Taiwan                    | NOAA              | 120.86            | 23.47            | 2867.00               | 25.0               | D                | 2006/08                     | 2021/04                   |
| LMP      | Lampedusa                                         | Italy                     | NOAA              | 12.63             | 35.52            | 50.00                 | 25.0               | D                | 2006/10                     | 2021/02                   |
| LMP      | Lampedusa                                         | Italy                     | ICOS-ATC,ENEA     | 12.63             | 35.52            | 53.00                 | 25.0               | C                | 2020/01                     | 2021/04                   |
| LMT      | Lamezia Terme                                     | Italy                     | ISAC              | 16.23             | 38.88            | 14.00                 | 30.0               | C                | 2015/01                     | 2016/12                   |
| LPO      | Ile Grande                                        | France                    | LSCE              | -3.58             | 48.80            | 20.00                 | 15.0               | D                | 2005/01                     | 2013/08                   |
| LUT      | Lutjewad                                          | Netherlands               | ICOS-ATC,RUG      | 6.35              | 53.40            | 61.00                 | 25.0               | C                | 2018/08                     | 2021/04                   |
| MAA      | Mawson, Antarctica                                | Australia                 | CSIRO             | 62.87             | -67.62           | 32.00                 | 4.5                | D                | 1984/04                     | 2021/02                   |
| MEX      | High Altitude Global Climate Observation Center   | Mexico                    | NOAA              | -97.31            | 18.98            | 4469.00               | 15.0               | D                | 2009/01                     | 2021/02                   |
| MHD      | Mace Head, County Galway                          | Ireland                   | NOAA              | -9.90             | 53.32            | 26.00                 | 25.0               | D                | 1999/01                     | 2021/03                   |
| MID      | Sand Island, Midway                               | United States             | NOAA              | -177.38           | 28.21            | 8.00                  | 15.0               | D                | 1999/01                     | 2021/03                   |
| MKN      | Mt. Kenya                                         | Kenya                     | NOAA              | 37.30             | -0.06            | 3649.00               | 25.0               | D                | 2003/12                     | 2011/06                   |
| MLO      | Mauna Loa, Hawaii                                 | United States             | NOAA              | -155.58           | 19.54            | 3437.00               | 15.0               | C                | 1999/01                     | 2021/04                   |
| MLO      | Mauna Loa, Hawaii                                 | United States             | NOAA              | -155.58           | 19.54            | 3402.00               | 15.0               | D                | 1999/01                     | 2021/04                   |
| MNM      | Minamitorishima                                   | Japan                     | JMA               | 153.98            | 24.29            | 27.10                 | 15.0               | C                | 1999/01                     | 2019/12                   |
| MQA      | Macquarie Island                                  | Australia                 | CSIRO             | 158.97            | -54.48           | 13.00                 | 4.5                | D                | 1990/04                     | 2021/02                   |
| MRC      | Marcellus Pennsylvania                            | United States             | PSU               | -76.42            | 41.47            | 652.00                | 75.0               | C                | 2015/05                     | 2019/01                   |
| NAT      | Farol De Mae Luiza Lighthouse                     | Brazil                    | NOAA              | -35.19            | -5.51            | 20.00                 | 15.0               | D                | 2010/09                     | 2020/03                   |
| NGL      | Neuglobsow                                        | Germany                   | UBA               | 13.03             | 53.14            | 62.00                 | 75.0               | C                | 2005/01                     | 2013/12                   |
| NMB      | Gobabeb                                           | Namibia                   | NOAA              | 15.01             | -23.58           | 461.00                | 25.0               | D                | 1999/01                     | 2021/02                   |
| NOR      | Norunda                                           | Sweden                    | ICOS-ATC,LUND-CEC | 17.48             | 60.09            | 146.00                | 15.0               | C                | 2017/04                     | 2021/04                   |
| NOY      | Noyabrsk                                          | Russian Federation        | NIES              | 75.78             | 63.43            | 188.00                | 30.0               | C                | 2005/10                     | 2018/12                   |
| NWR      | Niwot Ridge, Colorado                             | United States             | NOAA              | -105.57           | 40.05            | 3526.00               | 15.0               | D                | 1999/01                     | 2021/04                   |
| OPE      | Observatoire perenne de l'environnement           | France                    | ICOS-ATC,LSCE     | 5.50              | 48.56            | 510.00                | 30.0               | C                | 2016/08                     | 2021/04                   |
| OTA      | Otway Basin                                       | Australia                 | CSIRO             | 142.82            | -38.52           | 50.00                 | 30.0               | D                | 2005/09                     | 2014/08                   |
| OXK      | Ochsenkopf                                        | Germany                   | NOAA              | 11.81             | 50.03            | 1185.00               | 30.0               | D                | 2003/03                     | 2019/06                   |
| OXK      | Ochsenkopf                                        | Germany                   | ICOS-ATC,HPB      | 11.81             | 50.03            | 1185.00               | 30.0               | C                | 2019/09                     | 2021/04                   |
| PDM      | Pic du Midi                                       | France                    | LSCE              | 0.14              | 42.94            | 2887.00               | 15.0               | D                | 2005/02                     | 2018/02                   |
| POC      | Pacific Ocean                                     | Pacific Ocean             | NOAA              | -130.75           | 0.12             | 20.00                 | 15.0               | D                | 1999/01                     | 2017/07                   |
| PSA      | Palmer Station, Antarctica                        | United States             | NOAA              | -64.05            | -64.77           | 15.00                 | 4.5                | D                | 1999/01                     | 2020/12                   |
| PTA      | Point Arena, California                           | United States             | NOAA              | -123.74           | 38.95            | 22.00                 | 25.0               | D                | 1999/01                     | 2011/05                   |
| PUY      | Puy de Dome                                       | France                    | ICOS-ATC,LSCE     | 2.97              | 45.77            | 1475.00               | 15.0               | C                | 2016/08                     | 2021/05                   |
| RGL      | Ridge Hill                                        | United Kingdom            | UNIVBRIS          | -2.54             | 52.00            | 294.00                | 25.0               | C                | 2012/02                     | 2019/12                   |
| RPB      | Ragged Point                                      | Barbados                  | NOAA              | -59.43            | 13.16            | 20.00                 | 15.0               | D                | 1999/01                     | 2021/03                   |
| RUN      | La Réunion                                        | France                    | ICOS-ATC,LSCE     | 55.38             | -21.08           | 2160.00               | 15.0               | C                | 2018/05                     | 2021/04                   |
| RYO      | Ryori                                             | Japan                     | JMA               | 141.82            | 39.03            | 280.00                | 15.0               | C                | 1999/01                     | 2019/12                   |
| SAC      | Saclay                                            | France                    | ICOS-ATC,CEA      | 2.14              | 48.72            | 260.00                | 75.0               | C                | 2017/05                     | 2021/04                   |
| SCT      | Beech Island, South Carolina                      | United States             | NOAA              | -81.83            | 33.41            | 420.20                | 75.0               | C                | 2015/08                     | 2021/05                   |
| SDZ      | Shangdianzi                                       | China                     | NOAA              | 117.12            | 40.65            | 298.00                | 15.0               | D                | 2009/09                     | 2015/09                   |
| SEY      | Mahe Island                                       | Seychelles                | NOAA              | 55.53             | -4.68            | 7.00                  | 15.0               | D                | 1999/01                     | 2020/12                   |
| SGP      | Southern Great Plains, Oklahoma                   | United States             | NOAA              | -97.50            | 36.62            | 339.00                | 75.0               | D                | 2002/04                     | 2021/04                   |
| SGP      | Southern Great Plains, Oklahoma                   | United States             | LBNL-ARM          | -97.49            | 36.61            | 374.00                | 75.0               | C                | 2010/11                     | 2020/01                   |
| SHM      | Shemya Island, Alaska                             | United States             | NOAA              | 174.08            | 52.72            | 28.00                 | 25.0               | D                | 1999/01                     | 2021/03                   |
| SMO      | Tutuila                                           | American Samoa            | NOAA              | -170.56           | -14.23           | 60.30                 | 15.0               | D                | 1999/01                     | 2021/03                   |
| SNB      | Sonnblick                                         | Austria                   | EEA               | 47.05             | 12.96            | 3111.00               | 15.0               | C                | 2012/04                     | 2018/12                   |
| SPO      | South Pole, Antarctica                            | United States             | NOAA              | -24.80            | -89.96           | 2821.30               | 4.5                | D                | 1999/01                     | 2021/01                   |
| SSL      | Schauinsland                                      | Germany                   | UBA-Germany       | 7.92              | 47.90            | 1217.00               | 30.0               | C                | 2004/12                     | 2018/12                   |
| STE      | Steinkimmen                                       | Germany                   | ICOS-ATC,HPB      | 8.46              | 53.04            | 281.00                | 75.0               | C                | 2019/07                     | 2021/04                   |
| STM      | Ocean Station M                                   | Norway                    | NOAA              | 2.00              | 66.00            | 5.00                  | 25.0               | D                | 1999/01                     | 2009/11                   |
| SUM      | Summit                                            | Greenland                 | NOAA              | -38.42            | 72.60            | 3214.54               | 15.0               | D                | 2000/08                     | 2020/08                   |
| SVB [1]  | Svartberget                                       | Sweden                    | ICOS-ATC,SLU      | 19.77             | 64.26            | 419.00                | 25.0               | C                | 2017/06                     | 2021/04                   |
| SYO      | Syowa Station, Antarctica                         | Japan                     | NOAA              | 39.59             | -69.00           | 16.00                 | 4.5                | D                | 1999/01                     | 2021/01                   |
| TAC      | Tacolneston                                       | United Kingdom            | NOAA              | 1.14              | 52.52            | 236.00                | 25.0               | D                | 2014/06                     | 2016/01                   |
| TAP      | Tae-ahn Peninsula                                 | Republic of Korea         | NOAA              | 126.13            | 36.73            | 21.00                 | 75.0               | D                | 1999/01                     | 2021/02                   |
| THD      | Trinidad Head, California                         | United States             | NOAA              | -124.15           | 41.05            | 112.00                | 25.0               | D                | 2002/04                     | 2017/06                   |
| TIK      | Hydrometeorological Observatory of Tiksi          | Russia                    | NOAA              | 128.89            | 71.60            | 29.00                 | 15.0               | D                | 2011/08                     | 2018/09                   |
| TIK      | Tiksi                                             | Russian Federation        | FMI               | 128.89            | 71.60            | 29.00                 | 15.0               | C                | 2010/09                     | 2019/12                   |
| TOH      | Torffhaus                                         | Germany                   | ICOS-ATC,HPB      | 10.53             | 51.81            | 948.00                | 25.0               | C                | 2017/12                     | 2021/04                   |
| TPD      | Turkey Point, Ontario                             | Canada                    | EC                | -80.56            | 42.64            | 266.00                | 25.0               | C                | 2012/11                     | 2019/07                   |
| TRN      | Trainou                                           | France                    | ICOS-ATC,LSCE     | 2.11              | 47.96            | 311.00                | 25.0               | C                | 2016/08                     | 2021/04                   |
| USH      | Ushuaia                                           | Argentina                 | NOAA              | -68.31            | -54.85           | 32.00                 | 4.5                | D                | 1999/01                     | 2021/03                   |
| UTA      | Wendover, Utah                                    | United States             | NOAA              | -113.72           | 39.90            | 1332.00               | 25.0               | D                | 1999/01                     | 2021/04                   |
| UUM      | Ulaan Uul                                         | Mongolia                  | NOAA              | 111.10            | 44.45            | 1012.00               | 25.0               | D                | 1999/01                     | 2020/10                   |
| VGN      | Vaganovo                                          | Russian Federation        | NIES              | 62.32             | 54.50            | 277.00                | 30.0               | C                | 2008/06                     | 2018/12                   |
| VKV      | Voetikovo                                         | Russian Federation        | MGO               | 30.70             | 59.95            | 76.00                 | 25.0               | C                | 2008/05                     | 2014/12                   |
| WIS      | Weizmann Institute of Science at the Arava Ins... | Israel                    | NOAA              | 35.06             | 29.96            | 482.00                | 25.0               | D                | 1999/01                     | 2021/04                   |
| WKT      | Moody, Texas                                      | United States             | NOAA              | -97.32            | 31.31            | 256.00                | 75.0               | D                | 2001/03                     | 2006/11                   |
| WLG      | Mt. Waliguan                                      | Peoples Republic of China | NOAA              | 100.90            | 36.27            | 3890.00               | 15.0               | D                | 1999/01                     | 2020/12                   |
| WPC      | Western Pacific Cruise                            | Western Pacific           | NOAA              | 143.70            | 0.13             | 10.00                 | 15.0               | D                | 2004/12                     | 2013/06                   |
| WSA      | Sable Island, Nova Scotia                         | Canada                    | EC                | -60.01            | 43.93            | 8.00                  | 25.0               | C                | 2003/06                     | 2019/07                   |
| YAK      | Yakutsk                                           | Russian Federation        | NIES              | 129.36            | 62.09            | 344.00                | 30.0               | C                | 2007/09                     | 2013/12                   |
| YON      | Yonagunijima                                      | Japan                     | JMA               | 123.01            | 24.47            | 50.00                 | 30.0               | C                | 1999/02                     | 2019/12                   |
| ZEP      | Ny-Alesund, Svalbard                              | Norway and Sweden         | NOAA              | 11.89             | 78.91            | 479.00                | 15.0               | D                | 1999/01                     | 2021/03                   |
| ZEP      | Ny-Alesund, Svalbard                              | Norway and Sweden         | ICOS-ATC,NILU     | 11.89             | 78.91            | 489.00                | 15.0               | C                | 2017/07                     | 2021/04                   |
| ZOT      | Zottino                                           | Russian Federation        | MPBGC             | 89.21             | 60.48            | 415.00                | 25.0               | C                | 2009/05                     | 2016/12                   |
| ZOT      | Zottino                                           | Russian Federation        | MPBGC             | 89.21             | 60.48            | 415.00                | 15.0               | D                | 2006/10                     | 2013/06                   |
| ZSF      | Zugspitze / Schneefemerhaus                       | Germany                   | UBA-Germany       | 10.98             | 47.42            | 2670.00               | 30.0               | C                | 2004/12                     | 2019/12                   |

\*Sampling heights from which atmospheric CH<sub>4</sub> is sampled in TM5. \*\*Observations used in this study between 2010 and 2018.

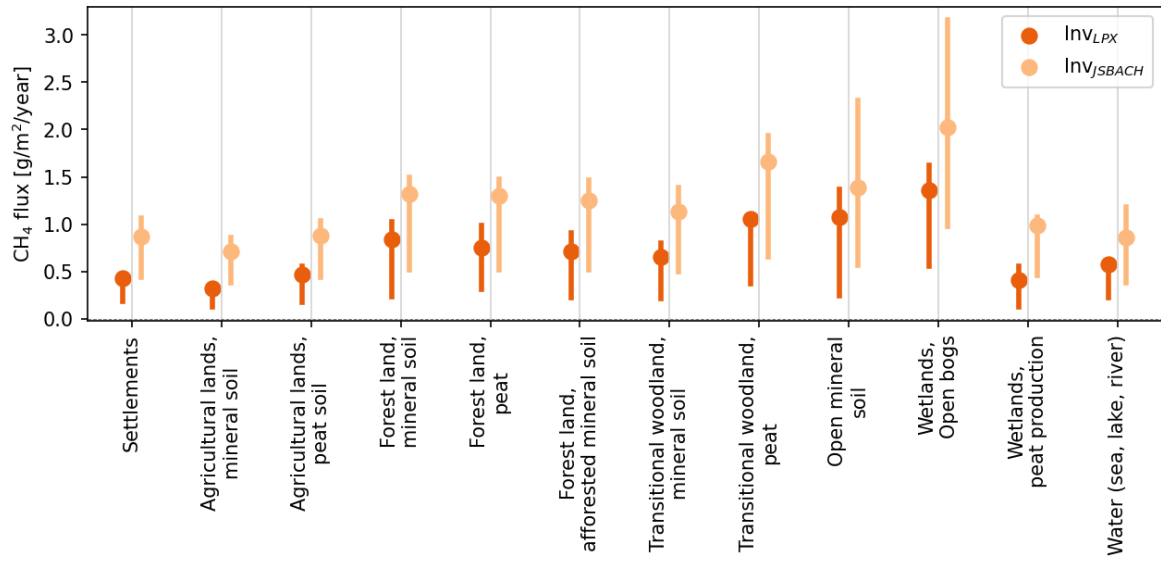

**Figure S5.** The range of annual natural CH<sub>4</sub> fluxes (2013–2020) decomposed for selected land cover classes estimated using proportional Corine land cover classes.

## 2. Using Machine Learning to Estimate LULUCF Methane Emissions

To detect LULUCF-related CH<sub>4</sub> emissions from the inversion model estimate, we used a machine learning model called gradient boosting. Gradient boosting trains multiple decision trees on a random subset of data, and the predictions of all trees are combined to produce a final result. This ensemble method is more accurate than a single decision tree and is less prone to overfitting. Gradient boosting is also robust to outliers and can perform automatic feature selection. We used a gradient boost library called XGBoost [2].

We trained the machine learning model with annual natural, anthropogenic and total CH<sub>4</sub> emissions estimates from Inv<sub>JSBACH</sub> and Inv<sub>LPX</sub>. The training was conducted in a resolution of 10 km × 10 km. The training and predicting of the CH<sub>4</sub> emissions were done separately for each year 2013–2020.

The fraction of each land cover class was calculated at 10 km × 10 km and all the land cover classes were used as features in the training of the machine learning model. The annual CH<sub>4</sub> emissions were resampled to the same resolution using kd-tree nearest neighbour approach in Python package called pyresample [3] and then used as the target value. With the trained model, we estimated the annual emissions for a grid cell that was occupied by only one land cover class. From the analysis, we excluded land cover classes that cover less than 0.2% (755 km<sup>2</sup>) of the total area of Finland. These classes were 'Forest land, afforested peat', 'Transitional woodland, deforested', 'Transitional woodland, peat, deforested', and 'Wetlands, Marsh'.

When the machine learning algorithm XGBoost was trained with optimised annual natural CH<sub>4</sub> emission estimates in Finland and the CH<sub>4</sub> emissions were estimated by a land cover class, the two

inversions,  $Inv_{JSBACH}$  and  $Inv_{LPX}$ , mostly agreed (Figure S9). The two land cover classes with the highest predicted natural emissions were 'Transitional woodland, peat' and 'Wetland, Open bogs'. Another notable feature was 'Forest, mineral soil', which showed higher emissions than the other classes with  $Inv_{LPX}$ . 'Forest land' in general was also higher when  $Inv_{JSBACH}$  was used. This was probably an artefact from the machine learning approach and the coarse resolution of CTE-CH<sub>4</sub>. 'Forest land, mineral soil' is the most prominent land cover class by a large margin covering almost a third of the area in Finland. It also correlated with almost all the other land cover classes (Figure S8), meaning forests existed near almost all land cover types. This led to a situation where there were always forests in grid cells with high CH<sub>4</sub> emissions. Additionally,  $Inv_{JSBACH}$  showed a larger land sink on mineral soils than  $Inv_{LPX}$ . These differences alongside the highlighted land cover types were reasonable given the land cover data the priors used. In addition, in some years XGBoost predicted a CH<sub>4</sub> sink for some land cover types on mineral soil. This was more pronounced with  $Inv_{JSBACH}$  than with  $Inv_{LPX}$ .

The average natural CH<sub>4</sub> emission on 'Transitional woodland, peat' predicted by the XGBoost was 1.7 g/m<sup>2</sup>/year with LPX and 2.0 g/m<sup>2</sup>/year with JSBACH. Even though these values are higher than the emissions factor for the poorly drained forests, they are still reasonable, especially when the range of observed values is considered [4].

When the machine learning model was trained with annual anthropogenic CH<sub>4</sub> emissions, 'Settlements' was the most prominent class (Figure S10). Predicted emissions in other classes were close to zero, with agricultural lands showing a bit larger emissions.

The XGBoost predicted CH<sub>4</sub> emissions trained with annual total emissions resembled the combination of the natural and anthropogenic emission results (Figure S11): the natural and anthropogenic sources listed above ('Transitional woodland, peat', 'Wetland, Open bogs', 'Settlements' and 'Forest land, mineral soil') were elevated from the rest of the land cover classes.

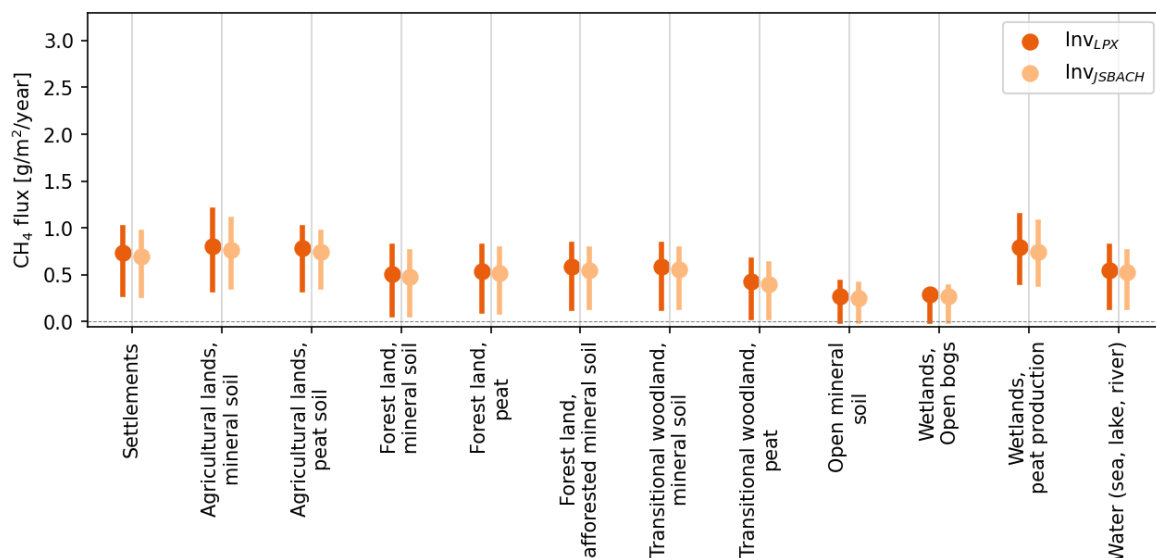

**Figure S6.** The range of annual anthropogenic CH<sub>4</sub> fluxes (2013–2020) decomposed for selected land cover classes estimated using proportional Corine land cover classes.



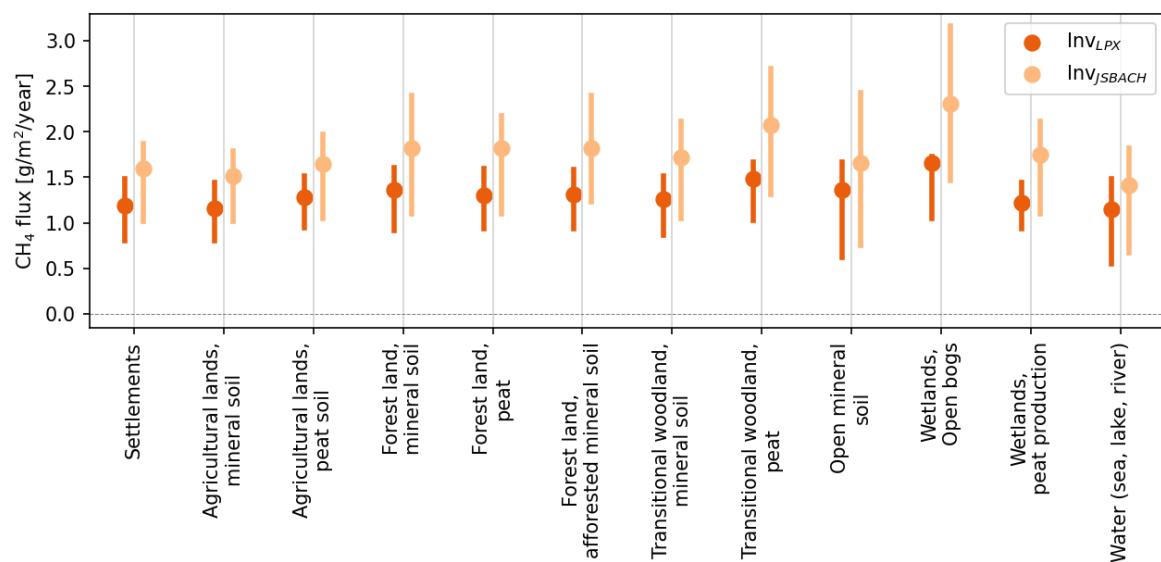

**Figure S7.** The range of annual total  $\text{CH}_4$  fluxes (2013–2020) decomposed for selected land cover classes estimated using proportional Corine land cover classes.

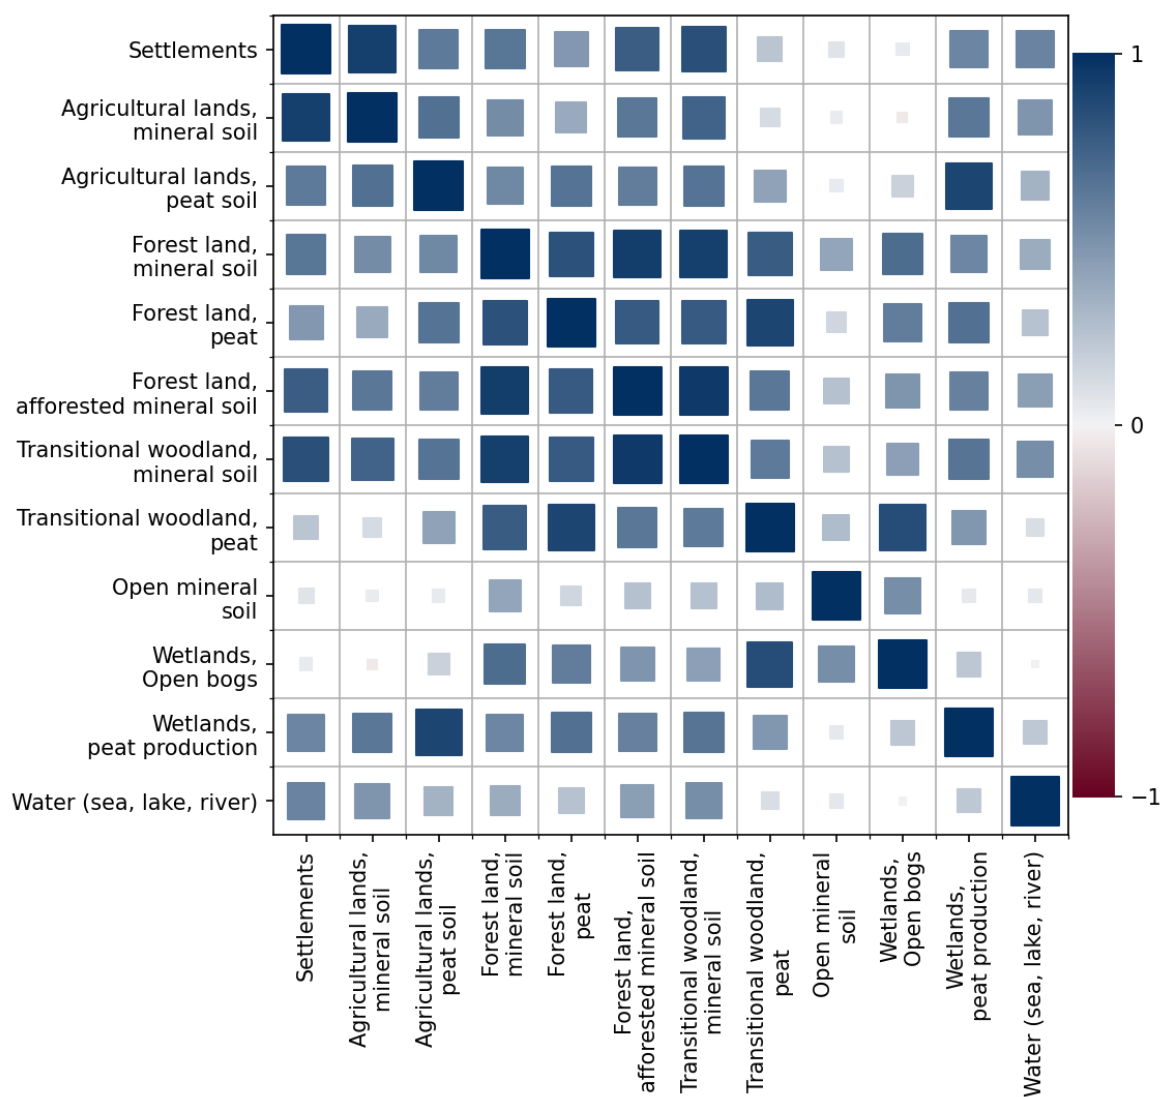

**Figure S8.** Pairwise Pearson correlation coefficient of the selected Corine land cover classes at a resolution of  $1^\circ \times 1^\circ$  in Finland. The colour of a square is related to the correlation coefficient and the size to the absolute value of the coefficient: an absolute value would fill the cell and a zero value would mean that there would be no square.

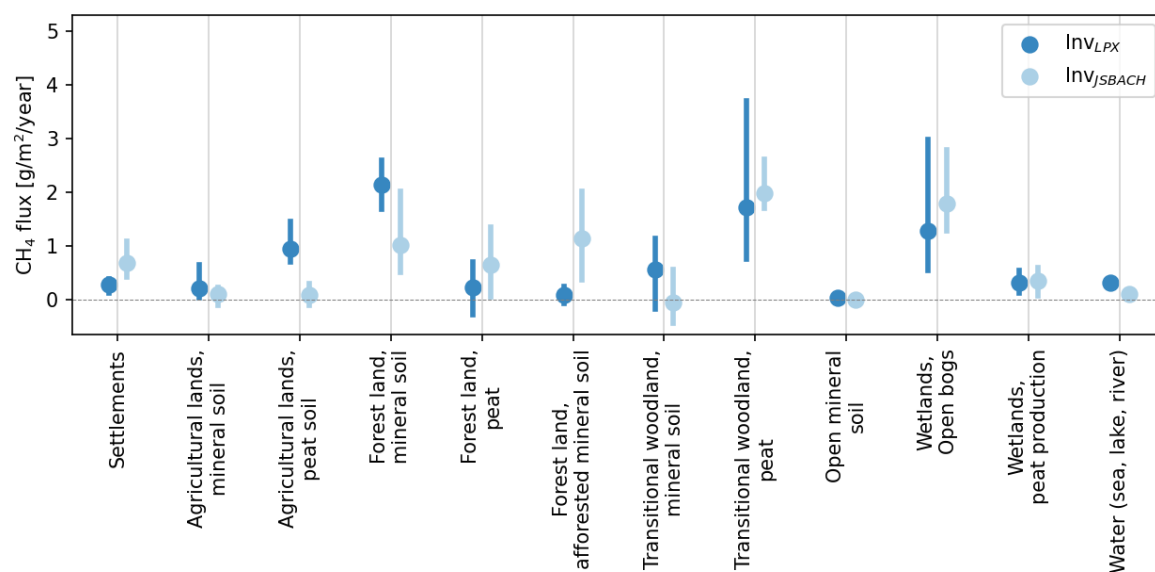

**Figure S9.** The range of the annual natural  $\text{CH}_4$  fluxes (2013–2020) for selected land cover classes estimated with XGBoost using optimised natural  $\text{CH}_4$  emissions from  $\text{Inv}_{\text{LPX}}$  and  $\text{Inv}_{\text{JSBACH}}$ .

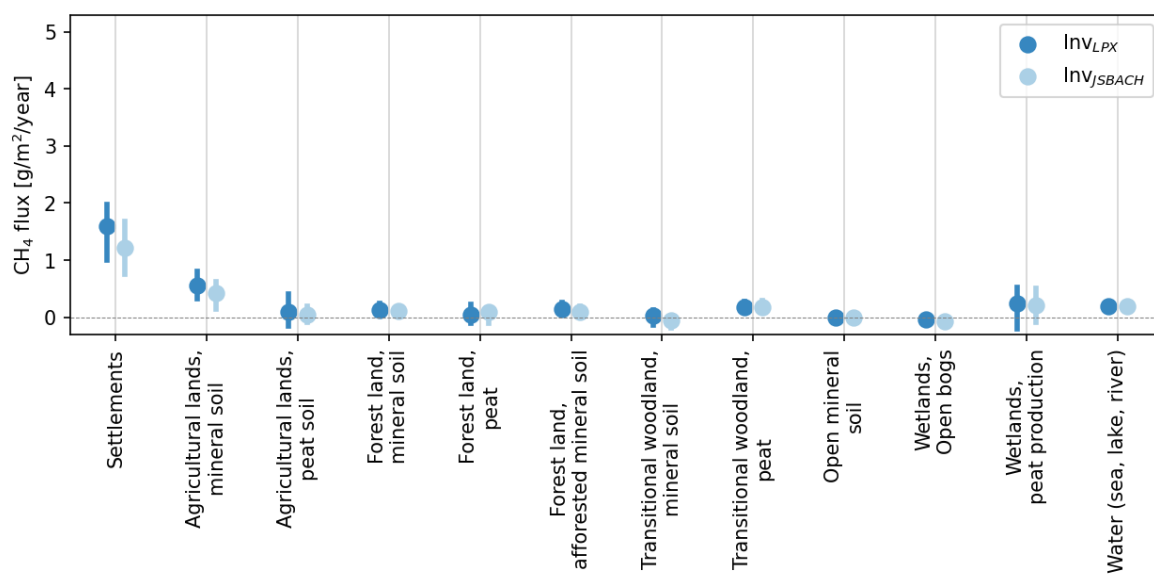

**Figure S10.** The range of annual anthropogenic  $\text{CH}_4$  fluxes (2013–2020) for selected land cover classes estimated with XGBoost using optimised anthropogenic  $\text{CH}_4$  emissions from  $\text{Inv}_{\text{LPX}}$  and  $\text{Inv}_{\text{JSBACH}}$ .

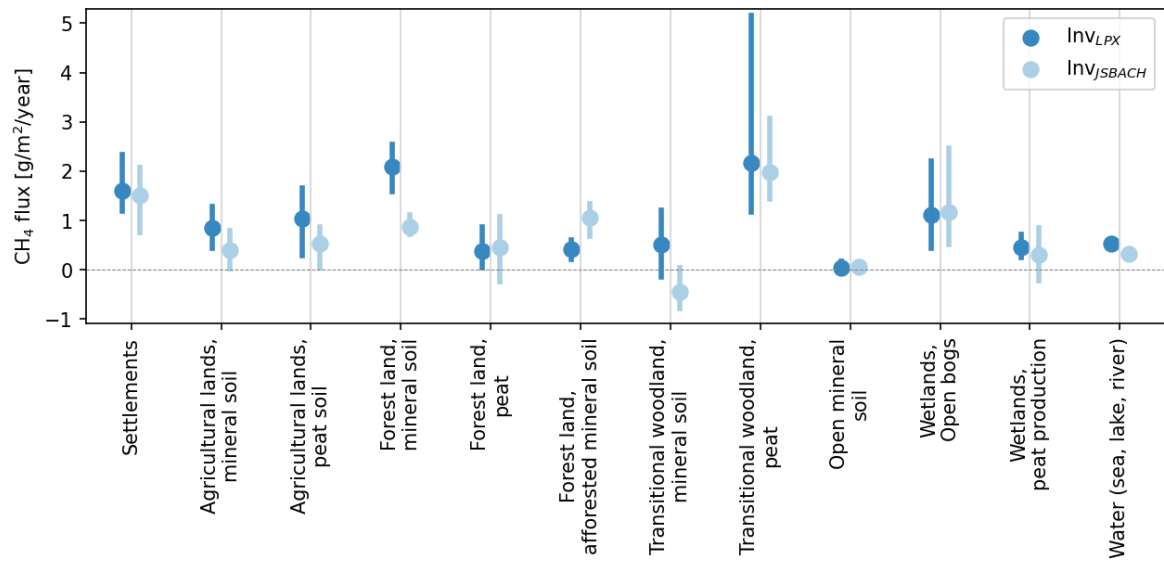

**Figure S11.** The range of annual total CH<sub>4</sub> fluxes (2013–2020) for selected land cover classes estimated with XGBoost using optimised total CH<sub>4</sub> emissions from Inv<sub>LPX</sub> and Inv<sub>JSBACH</sub>.

## References

1. Marklund, P.; Ottosson-Löfvenius, M.; Smith, P. ICOS ATC CH<sub>4</sub> Release, Svartberget (150.0 m), 2017-06-01–2022-02-28, 2022.
2. Chen, T.; Guestrin, C. XGBoost: A Scalable Tree Boosting System. Proceedings of the 22nd ACM SIGKDD International Conference on Knowledge Discovery and Data Mining; ACM: New York, NY, USA, 2016; Vol. 42, pp. 785–794. doi:10.1145/2939672.2939785.
3. Hoese, D.; Raspaud, M.; Lahtinen, P.; Roberts, W.; Lavergne. py troll/pyresample: Version 1.16.0., 2020. doi:10.5281/zenodo.3372769.
4. Ojanen, P.; Minkkinen, K.; Alm, J.; Penttilä, T. Soil-atmosphere CO<sub>2</sub>, CH<sub>4</sub> and N<sub>2</sub>O fluxes in boreal forestry-drained peatlands. *Forest Ecology and Management* **2010**, 260, 411–421. doi:10.1016/j.foreco.2010.04.036.
